# Supplementary material for: The Listeria monocytogenes Key Virulence Determinants hly and prfA are involved in Biofilm Formation and Aggregation but not Colonization of Fresh Produce
Source: MDPI journal article supplement (doi:10.3390/pathogens7010018), 2018-02-01
Supplement: s1 [file s1]

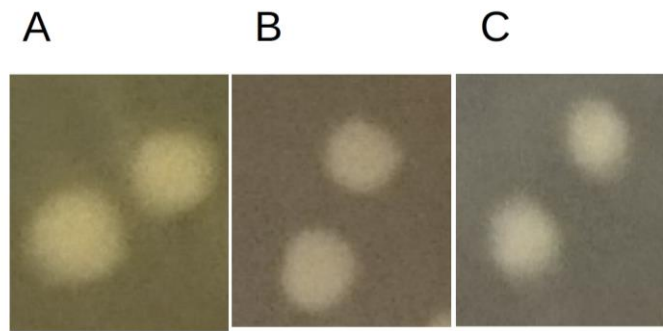

**Supplemental Figure 1.** Colony morphology of (A) wild type 2858, (B) *hly* inactivated mutant B2G6, and (C) *prfA* inactivated mutant J2E3.

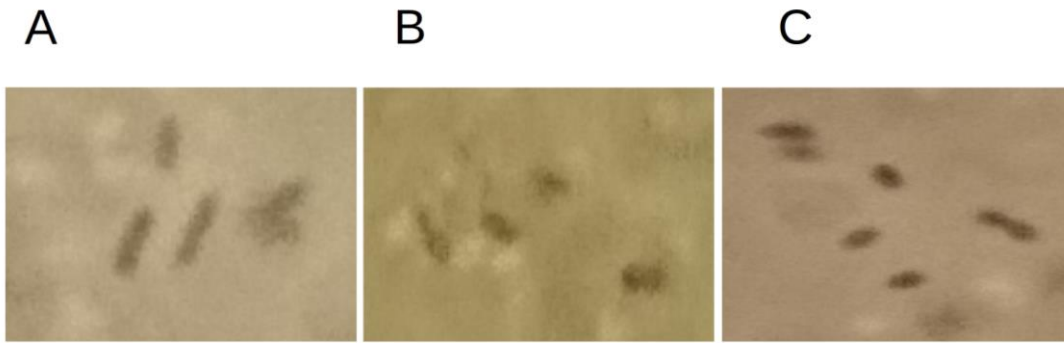

**Supplemental Figure 2.** Cell morphology of (A) wild type 2858, (B) *hly* inactivated mutant B2G6, and (C) *prfA* inactivated mutant J2E3.

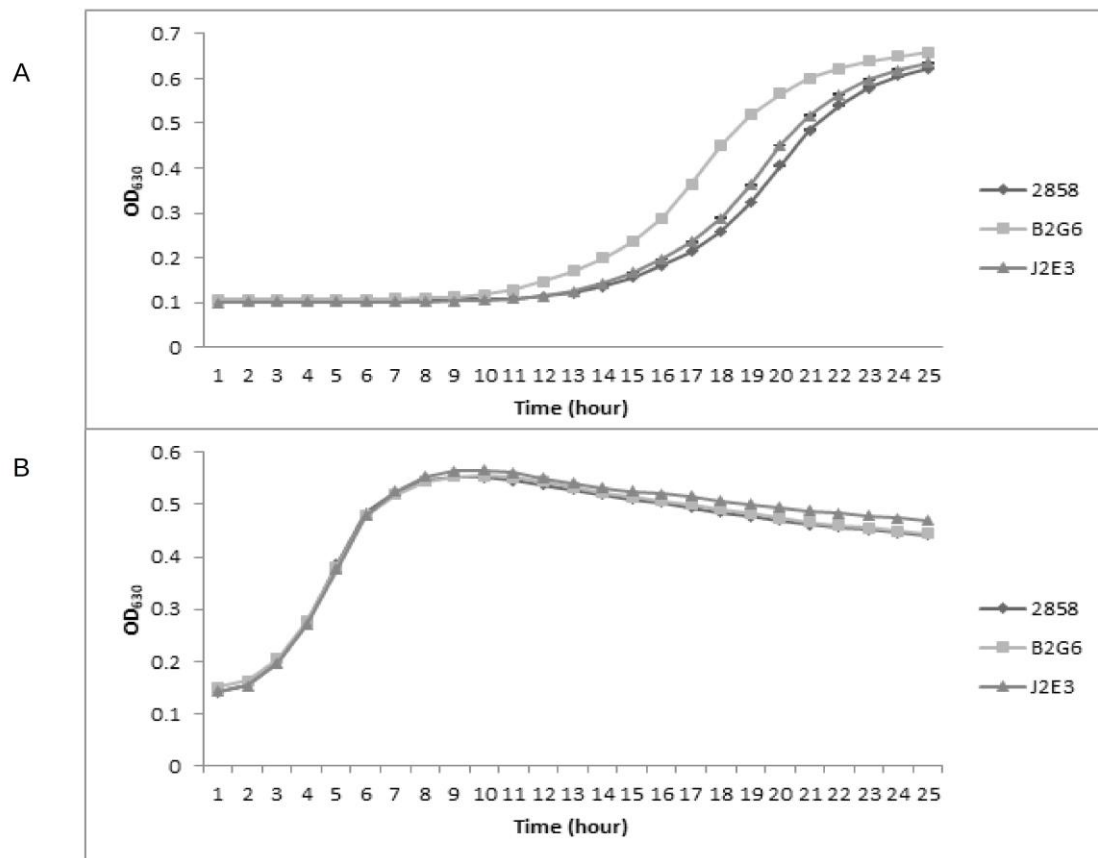

**Supplemental Figure 3.** Growth curves of wild type 2858, *hly* inactivated mutant B2G6, and *prfA* inactivated mutant J2E3 at (A) 28 and (B) 37 °C.
